# Supplementary material
Source: bioRxiv or medRxiv preprint supplement (http://medrxiv.stage.highwire.org/highwire/filestream/86392/field_highwire_adjunct_files/0/2020.06.15.20131284-1.pdf)
Supplement: Supplementary file [file 2020.06.15.20131284-1.pdf]

1 **Supplementary Online Materials**

2

3 Xue et al.

4

5

## Supplementary Notes

### Supplementary Note 1: Identifying misreporting “never drinkers” in the UKB

Following Klatksy et al.<sup>1</sup>, we attempted to identify “suspicious” self-reported never drinkers using follow-up questionnaires and medical records. The UKB had online follow-up questionnaires in 2017. There were 11 questions related to “alcohol use” in the “mental health” category ( $n = 157,365$ ). We extracted the “frequency of drinking alcohol” (data-field ID: 20414) of 3,627 self-reported never drinkers in the first assessment (2006-2010), but 335 of them (~9.2%) reported that they were not never drinkers in this follow-up assessment (2017). Although these individuals could change drinking status after a few years, it is reasonable to suspect the reliability of their reported drinking status in the initial assessment. We also extracted the ICD 10 codes (data-field ID: 41202) of 14,488 self-reported never drinkers. People with diagnosed alcohol-related diseases were very likely to have misreported their drinking status. The diseases include E24.4: alcohol-induced pseudo-Cushing's syndrome, F10: mental and behavioural disorders due to use of alcohol, G31.2: degeneration of nervous system due to alcohol, G62.1: alcoholic polyneuropathy, G72.1: alcoholic myopathy, I42.6: alcoholic cardiomyopathy, K29.2: alcoholic gastritis, K70: alcoholic liver disease, K85.2: alcohol-induced acute pancreatitis, K86.0: alcohol-induced chronic pancreatitis, R78.0: finding of alcohol in blood, T51: toxic effect of alcohol, Z50.2: alcohol rehabilitation, and Z72.1: alcohol use. There were 77 individuals diagnosed with these diseases; thus, their self-report drinking status was also likely to be unreliable.

### Supplementary Note 2: Simulation

To validate our findings, we performed a series of simulations to mimic MLC due to disease ascertainment. There were four simulation scenarios, as shown in **Supplementary Figure 4**. We simulated 20,000 individuals and 100 causal variants affecting a behavioural phenotype (Y) and another set of independent 100 causal variants affecting the liability of a disease (D). Both Y and D were quantitative. The variance explained by the causal variants was 0.6 for both Y and D, *i.e.*,  $h_Y^2 = h_D^2 = 0.6$ . The SNP effects were randomly drawn from  $\mathcal{N}(0,1)$ . The causal effect ( $b_{xy}$ ) of Y on D was set to 0.2.

We mimicked the disease ascertainment by reducing Y to a lower level if the corresponding D value was high. In other words, those individuals with high D values (located in the 10, 20, 30 or 40% upper tail of the distribution) were regarded as disease carriers, and their Y values were deducted by a constant (1-5 standard deviations, *s.d.*). After the ascertainment, we rescaled Y and conducted GWAS for Y and D, and then estimated the SNP effect correlation ( $r_b$ ) between Y and D, and the causal effect ( $b_{xy}$ ) of Y on D.

43 In model I, where Y and D are independent, and the SNPs are associated with Y only, the  $r_b$  and  $b_{xy}$   
44 estimates are expected to be 0 in the absence of ascertainment, consistent with our simulation results  
45 (**Supplementary Figure 5A**). However, the ascertainment generated a negative correlation between  
46 Y and D, leading to negative estimates of both  $r_b$  and  $b_{xy}$  (**Supplementary Figures 5 and 6**).

47

48 In model II, where Y had a causal effect on D, and the SNPs only have direct effects on Y, the  $\hat{r}_b$  only  
49 slightly decreased with the increased strength of ascertainment, suggesting that the SNP effect  
50 correlation estimate under a causal model is not heavily biased by the ascertainment (**Supplementary**  
51 **Figure 5B**). Even when 10% of the individuals in the upper tail of the distribution of D were reduced  
52 by 5 *s.d.* units in Y, the  $\hat{r}_b$  only decreased from 1.000 (*s.e.* = 0.003) to 0.929 (*s.e.* = 0.003). In the  
53 meanwhile, the causal effect estimate from MR analysis increased from 0.200 (*s.e.* = 0.002) to 0.390  
54 (*s.e.* = 0.004). Notably, the number of index SNPs decreased as the ascertainment became stronger  
55 (**Supplementary Figure 6B**), indicating that the ascertainment could reduce the power to detect  
56 causal variants in GWAS.

57

58 In model III, where Y and D were independent, and the SNPs were associated with D only, the  
59 ascertainment induced a negative correlation between Y and D (**Supplementary Figure 5C**), and  
60 more genome-wide significant SNPs were detected to be associated with Y as the ascertainment  
61 strength became larger (**Supplementary Figure 6C**).

62

63 In model IV, where Y has a causal effect on D with 100 SNPs affecting Y and another set of 100  
64 SNPs affecting D, the  $\hat{r}_b$  gradually changed from positive to negative as the ascertainment became  
65 stronger (**Supplementary Figure 5D**). In the MR analysis, when the ascertainment strength was  
66 modest, the  $\hat{b}_{xy}$  was more robust than the  $\hat{r}_b$  (**Supplementary Figure 6D**).

67

68 The simulation above is all for longitudinal change; however, we can also simulate underreporting  
69 using a similar procedure, *i.e.*, assigning a lower value to Y for individuals with large D. The only  
70 difference between underreporting and longitudinal change in the simulation is the proportion of  
71 individuals affected. We set the proportion of underreporting individuals from 2% to 8% of the upper  
72 tail of the distribution of D based on that observed in the UKB. Our simulation results showed that the  
73 effects of ascertainment bias from underreporting were smaller than those from longitudinal change  
74 (**Supplementary Figure 7-8**).

75

### 76 **Supplementary Note 3: The relationship between AC and cardiovascular disease (CVD)**

77 To investigate the observed relationship between AC and CVD, we first performed logistic regression  
78 analyses of cardiovascular disease on different AC intake levels as suggested in Wood et al.<sup>2</sup>. The

relationship was J-shaped where moderate drinking showed a lower disease risk and heavy drinking showed a higher disease risk than that in the reference group ( $0 \leq \text{intake level} \leq 25$  grams/week) (**Supplementary Figure 13A**). We performed the MLC corrections by excluding underreporting individuals and individuals who reduced drinking because of illness or doctor's advice, and fitted longitudinal change as the covariate in the logistic model. The J-shape relationship remained but the risk threshold (the point at which OR of CAD becomes larger than 1 as AC increases) shrank towards the left (**Supplementary Figure 13B**). However, when we removed only the individuals who had reduced their drinking amount in the reference group, the relationship between AC and CVD became monotonically increasing (**Supplementary Figure 13C**), suggesting an enrichment of disease ascertained individuals in the reference group as demonstrated in **Supplementary Figure 12**.

#### **Supplementary Note 4: MLC corrections for smoking intensity**

According to the self-reported records in the UKB (data-field ID: 20116), there were ~245,000 never smokers, ~162,000 previous smokers and ~47,000 current smokers. The cigarettes per day (CPD) data were collected among the current smokers who used manufactured cigarettes or hand-rolled cigarettes (data-field ID: 3456). According to the self-reported longitudinal change information from 32,801 current cigarette smokers (data-field ID: 3506), 5,559 individuals increased their smoking intensity, 13,235 maintained the same intensity and 13,941 reduced their smoking intensity compared to 10 years ago. We performed the MLC corrections for CPD by 1) partitioned the current smokers into three longitudinal change groups, 2) excluded 3,308 individuals who chose illness/doctor's advice as the reason for reducing smoking (data-field ID: 6158), 3) performed GWAS in each group with standardised CPD and meta-analysed GWAS summary statistics from the three groups. We compared the GWAS results for CPD with or without the MLC corrections (**Methods**) and found that the estimate of genetic correlation between CPD before and after the MLC corrections was not significantly different from 1 ( $\hat{r}_g = 0.985$ ,  $s.e. = 0.015$ ). Additionally, we did not observe any large differences in the  $\hat{r}_g$  of CPD with diseases before and after the MLC corrections (**Supplementary Table 13** and **Supplementary Figure 16**).

#### **Supplementary Note 5: Acknowledgements**

**UKB:** This study has been conducted using UK Biobank resource under Application Number 12505. UK Biobank was established by the Wellcome Trust medical charity, Medical Research Council, Department of Health, Scottish Government and the Northwest Regional Development Agency. It has also had funding from the Welsh Assembly Government, British Heart Foundation and Diabetes UK.

114 **Supplementary Figures**

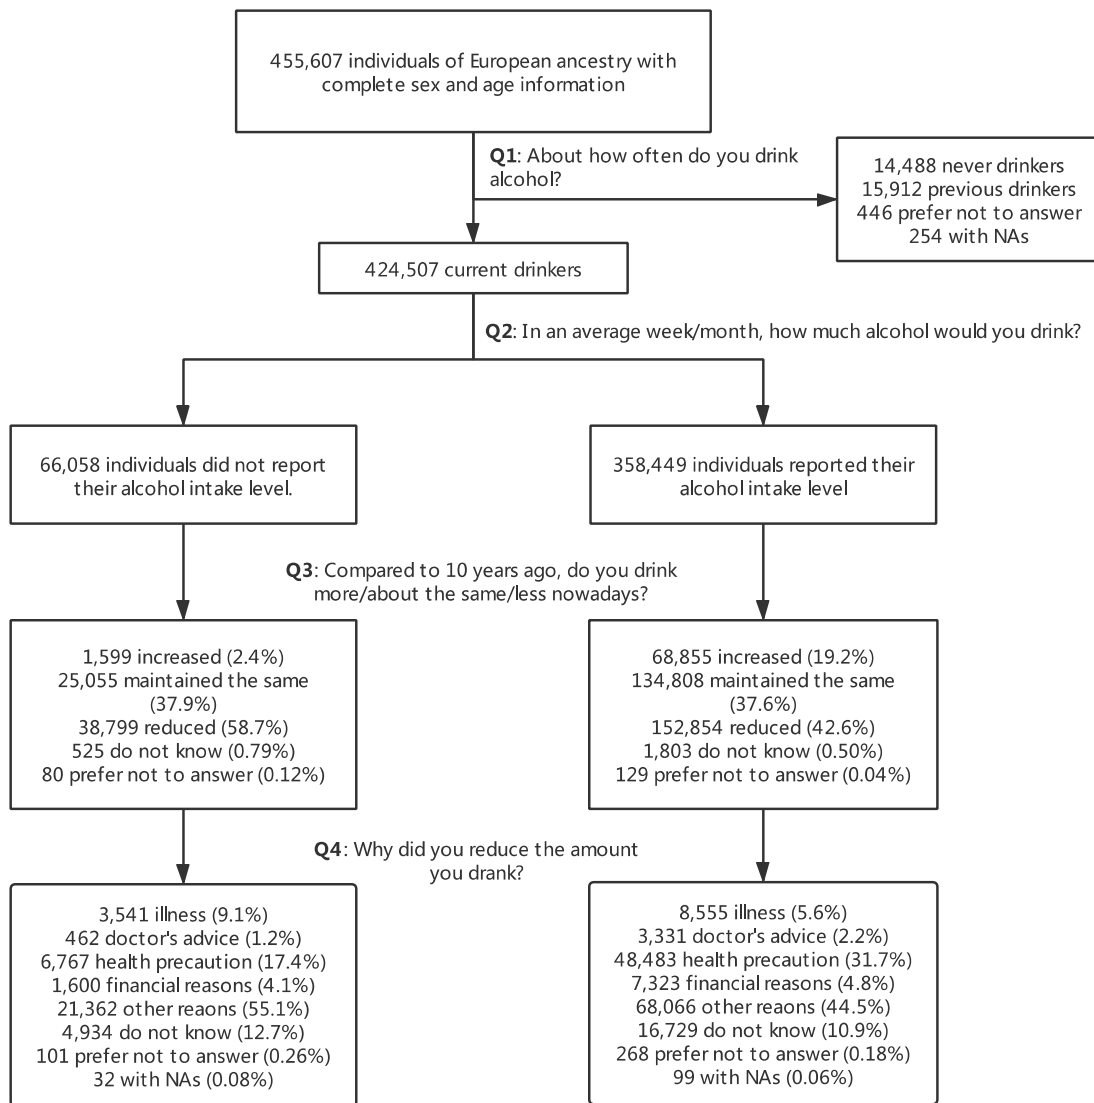

115  
116 **Supplementary Figure 1. Flow chart of the alcohol-related questionnaire in the UK Biobank.**

117 The full questionnaire can be found in page 35-38 at

118 <http://biobank.ndph.ox.ac.uk/showcase/showcase/docs/TouchscreenQuestionsMainFinal.pdf>.

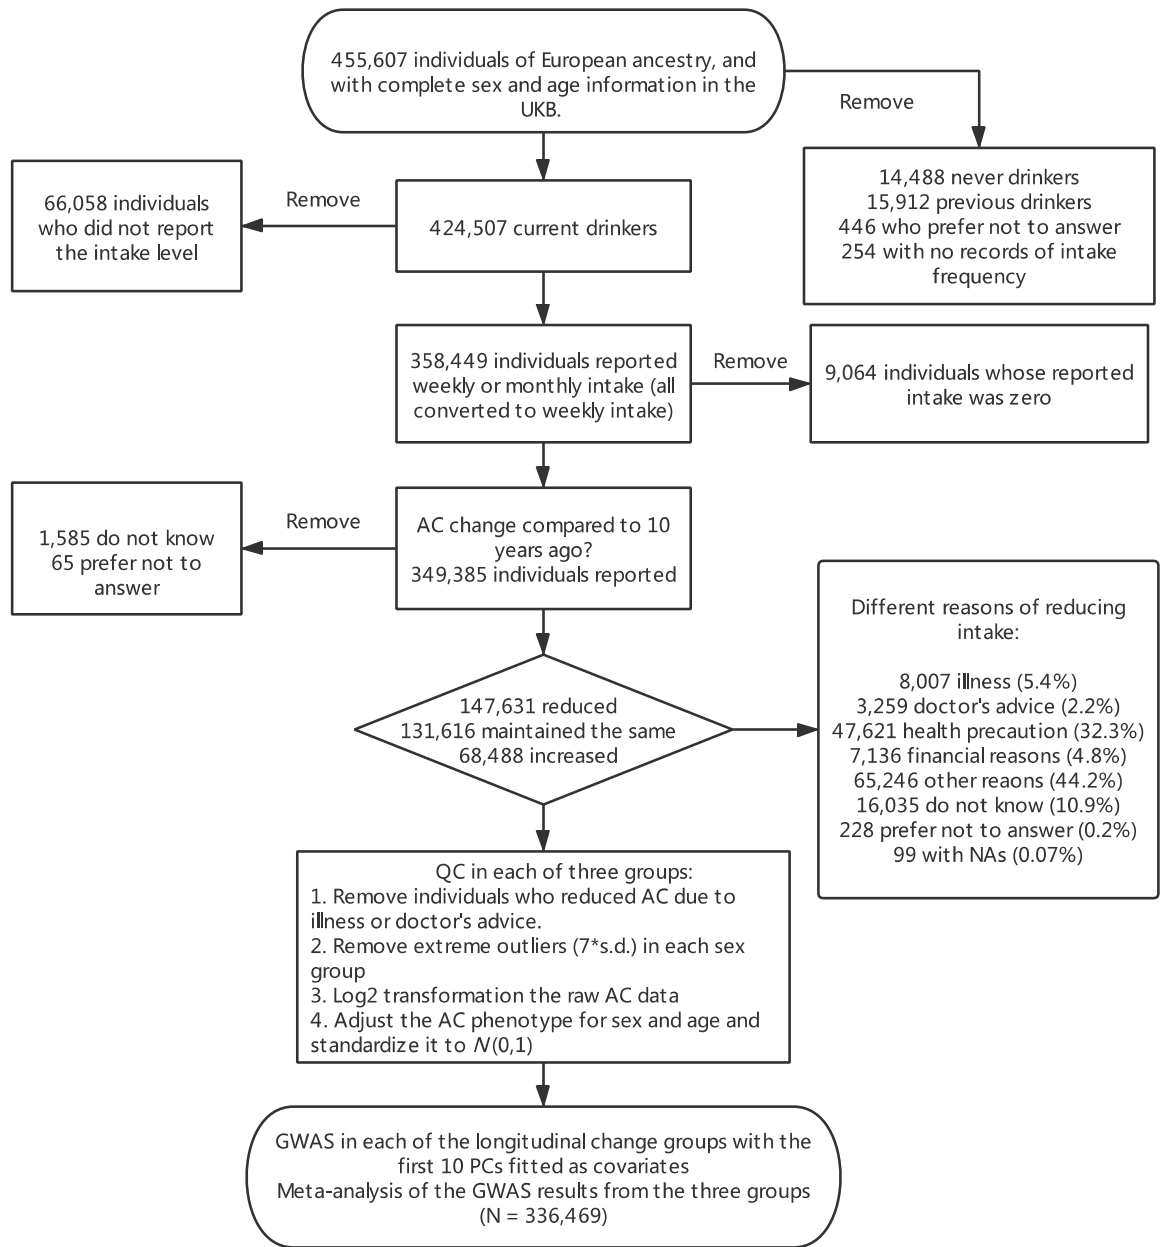

**Supplementary Figure 2. Flow chart of the MLC corrections for alcohol consumption.** UKB: UK Biobank. AC: alcohol consumption. QC: quality control. PC: principal component.

124

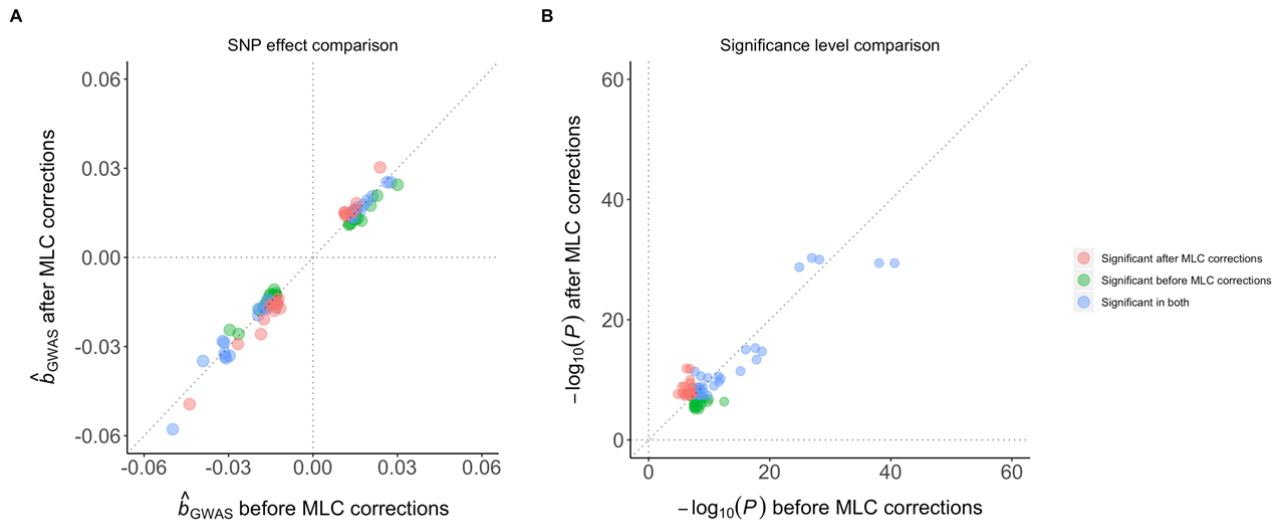

125

126 **Supplementary Figure 3. Comparison between alcohol consumption GWAS results before and**127 **after the MLC corrections. (A):** Effects of the AC-associated SNPs before and after the MLC

128 corrections. The red dots denote the SNPs that were not significantly associated with AC but became

129 significant ( $P < 5 \times 10^{-8}$ ) after the MLC corrections. The green dots denote the SNPs that were

130 significant but became non-significant the MLC corrections. The blue dots indicate the SNPs that

131 were significant in both. (B): The  $-\log_{10} P$ -values of the AC-associated SNPs before and after the132 MLC corrections. The top SNP rs1229984 at the *ADH1B* locus is omitted due to its large effect size;133 the effect of the T allele was  $-0.24$  ( $P = 4.10 \times 10^{-214}$ ) and  $-0.23$  ( $P = 1.04 \times 10^{-167}$ ),

134 respectively, before and after the MLC corrections.

135

136

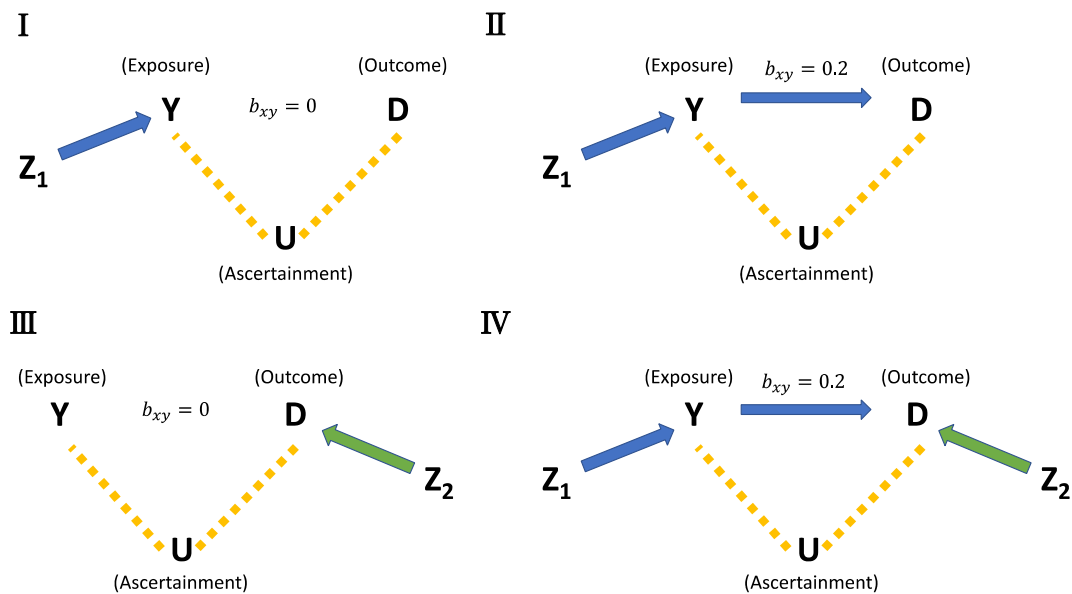

137

138 **Supplementary Figure 4. Four models used in the simulations to mimic disease ascertainment.**

139  $Y$  is a behavioural phenotype,  $D$  is the liability of a disease,  $Z_1$  is a set of causal variants for  $Y$ , and  $Z_2$

140 is a set of causal variants for  $D$ . The yellow dashed line indicates the association between  $Y$  and  $D$

141 induced by the change of  $Y$  conditioning on  $D$  via ascertainment ( $U$ ). Model  $\square$ :  $Y$  and  $D$  are

142 independent, and 100 SNPs are associated  $Y$ . Model  $\square$ :  $Y$  had a causal effect on  $D$ , and 100 SNPs are

143 associated with  $Y$  (and  $D$  mediated through  $Y$ ). Model  $\square$ :  $Y$  and  $D$  are independent, and 100 SNPs are

144 associated with  $D$ . Model  $\square$ :  $Y$  had a causal effect on  $D$ , 100 SNPs are associated with  $Y$  (and  $D$

145 mediated through  $Y$ ), and another set of 100 SNPs are associated with  $D$  directly.

146



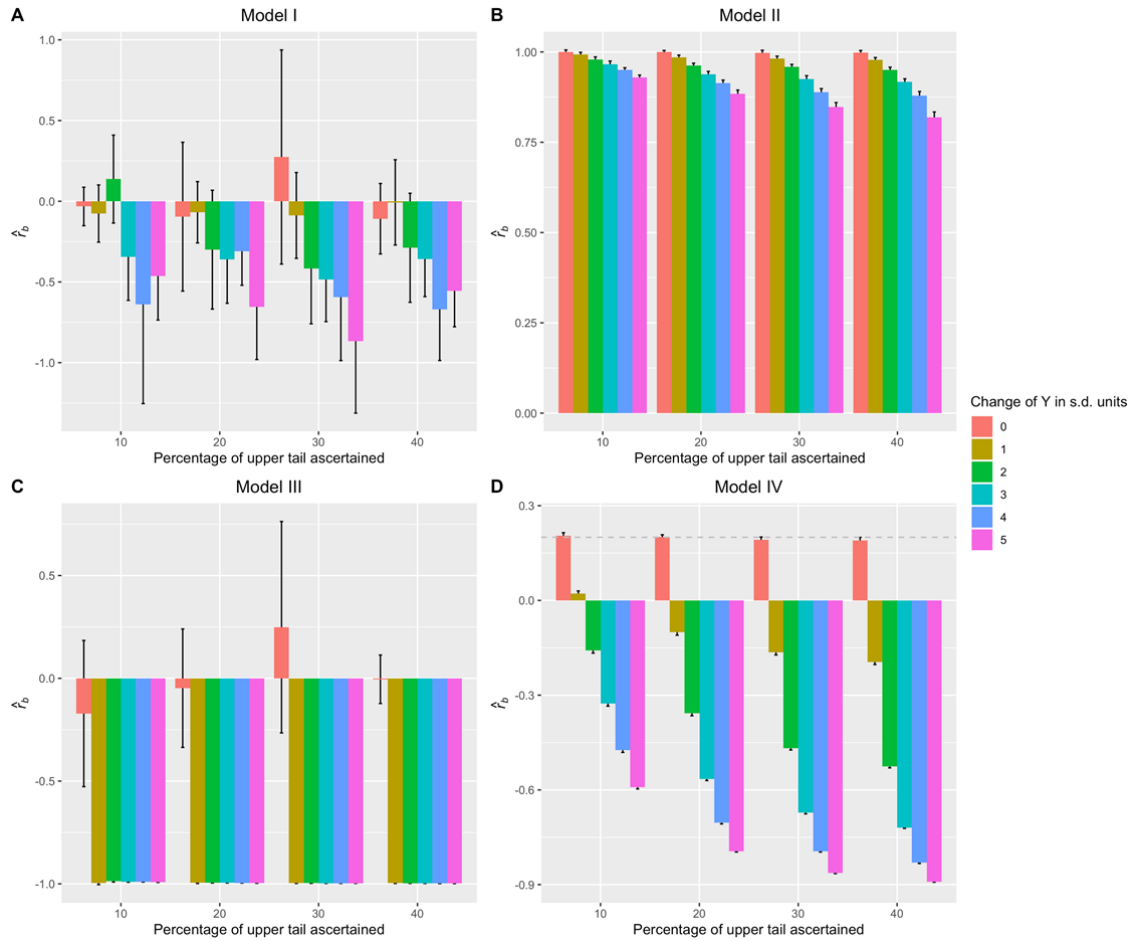

**Supplementary Figure 5. Quantifying bias in the estimated SNP effect correlation due to longitudinal change by simulation.** The four models are defined in **Supplementary Figure 4**. The x-axis indicates the percentage of ascertained individuals. The y-axis indicates the  $r_b$  estimates. The colour of the bar indicates the strength of ascertainment (*i.e.*, the change of the phenotype Y in *s.d.* units). Change in *s.d.* = 0 means no ascertainment. The grey dashed line indicated  $r_b = 0.2$ .

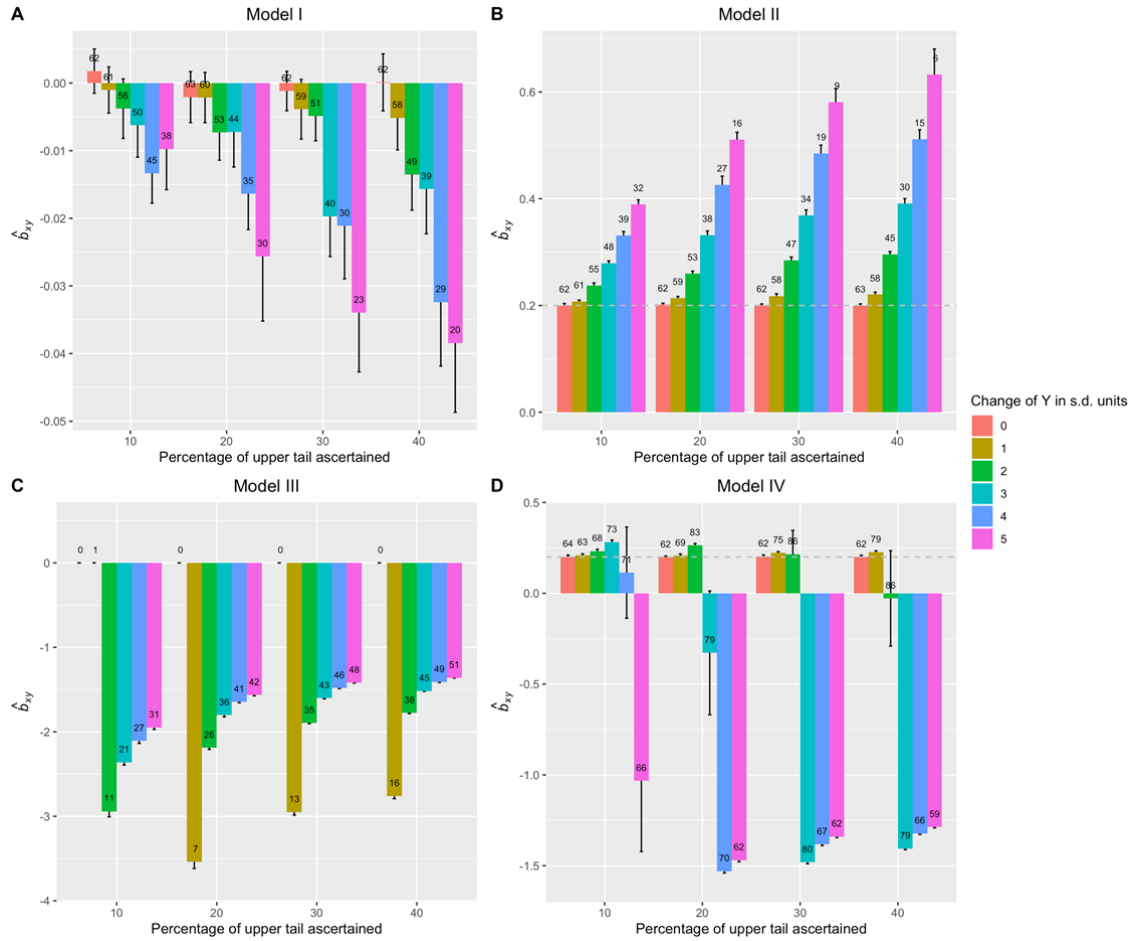

**Supplementary Figure 6. Quantifying bias in the estimated causal effect due to longitudinal change by simulation.** The four models are defined in **Supplementary Figure 4**. The x-axis indicates the percentage of ascertained individuals. The y-axis indicates the causal effect estimates,  $\hat{b}_{xy}$ . The colour of the bar indicates the strength of ascertainment (*i.e.*, the change of the phenotype Y in *s.d.* units). Change in *s.d.* = 0 means no ascertainment. The number labelled on the bar indicates the number of genome-wide significant SNPs of Y. Some of the bars are missing in panel C because there were not enough instrumental SNPs to perform the GSMR analysis. The grey dashed line indicated  $\hat{b}_{xy} = 0.2$ .

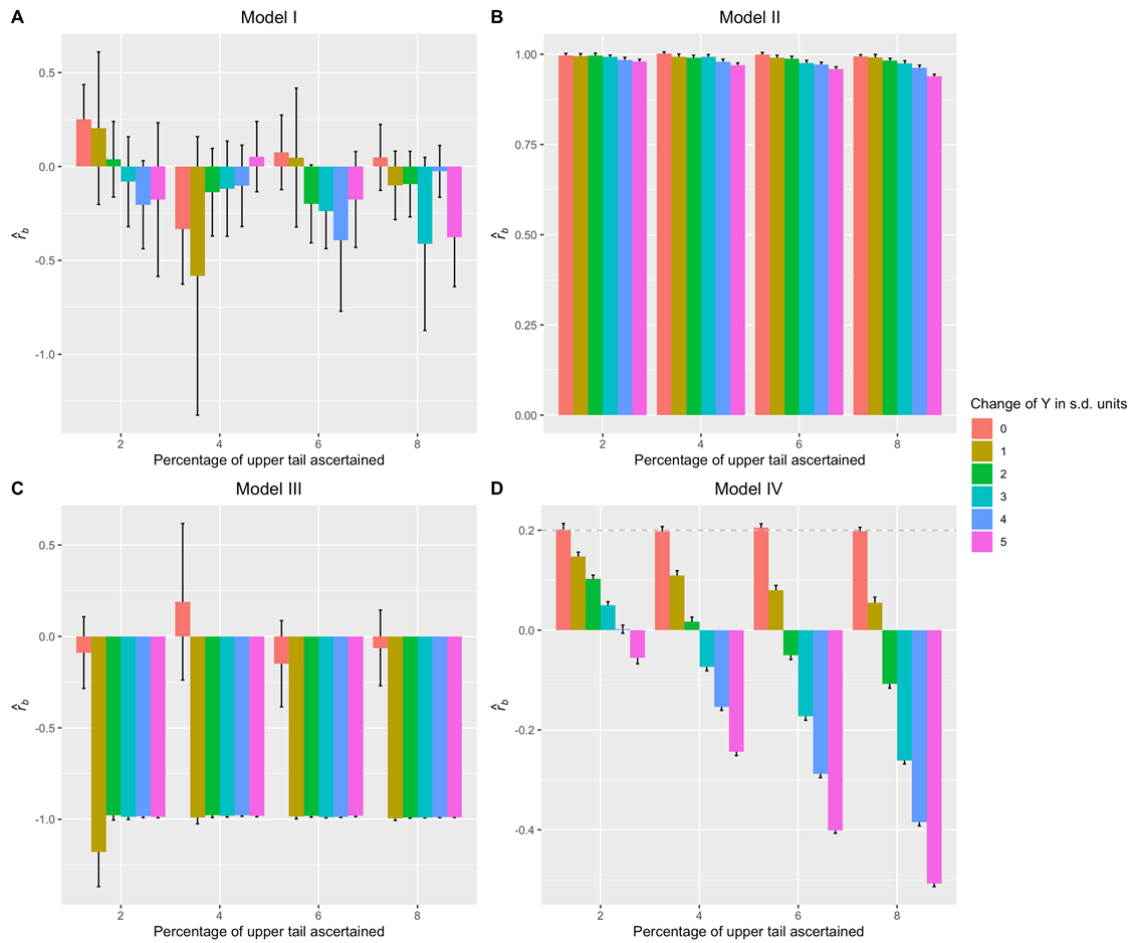

**Supplementary Figure 7. Quantifying bias in the estimated SNP effect correlation due to misreporting by simulation.** All the labels and colour code are the same as those in Supplementary Figure 5.

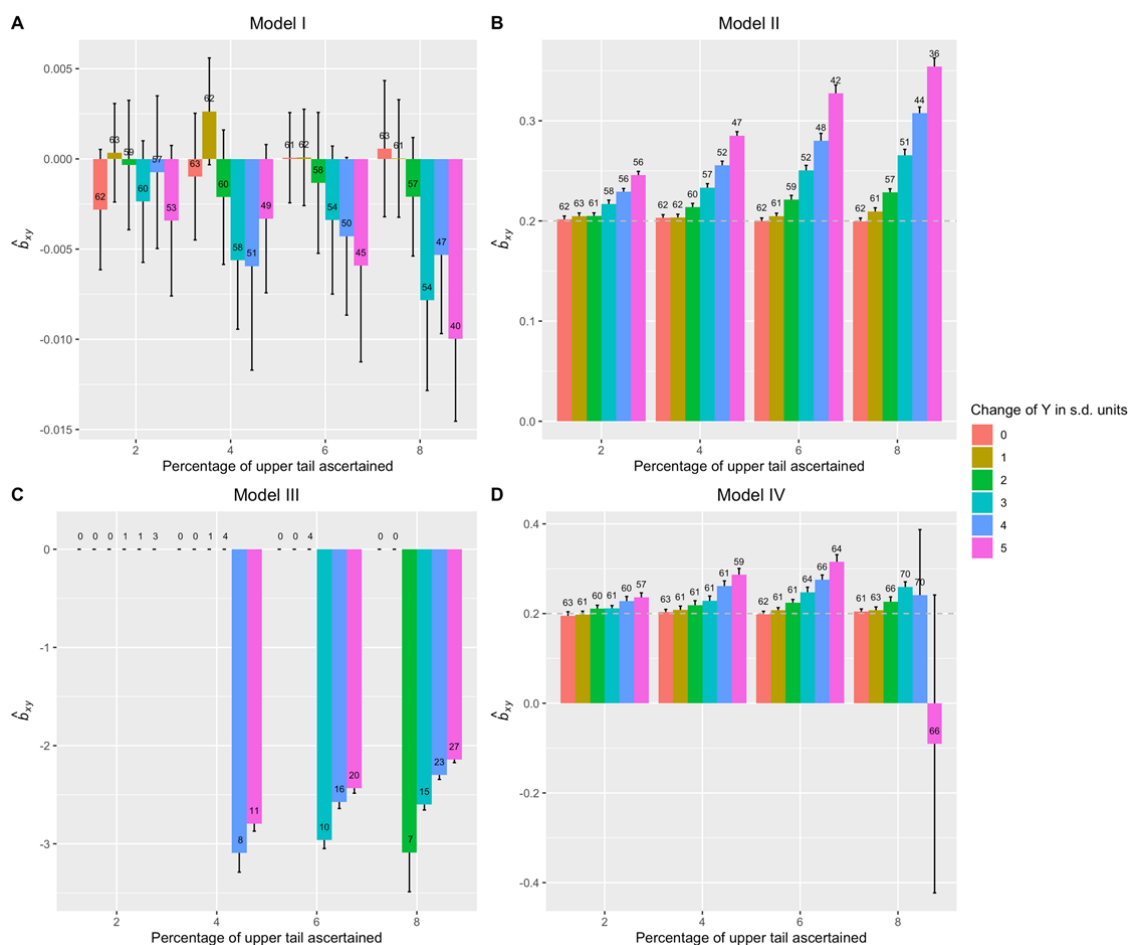

**Supplementary Figure 8. Quantifying bias in the estimated causal effect due to misreporting by simulation.** All the labels and colour code are the same as those in **Supplementary Figure 6**. Change in *s.d.* = 0 means no ascertainment. The number labelled on the bar indicates the number of genome-wide significant SNPs of Y. Some of the bars are missing in panel C because there were not enough instrumental SNPs to perform the GSMR analysis.

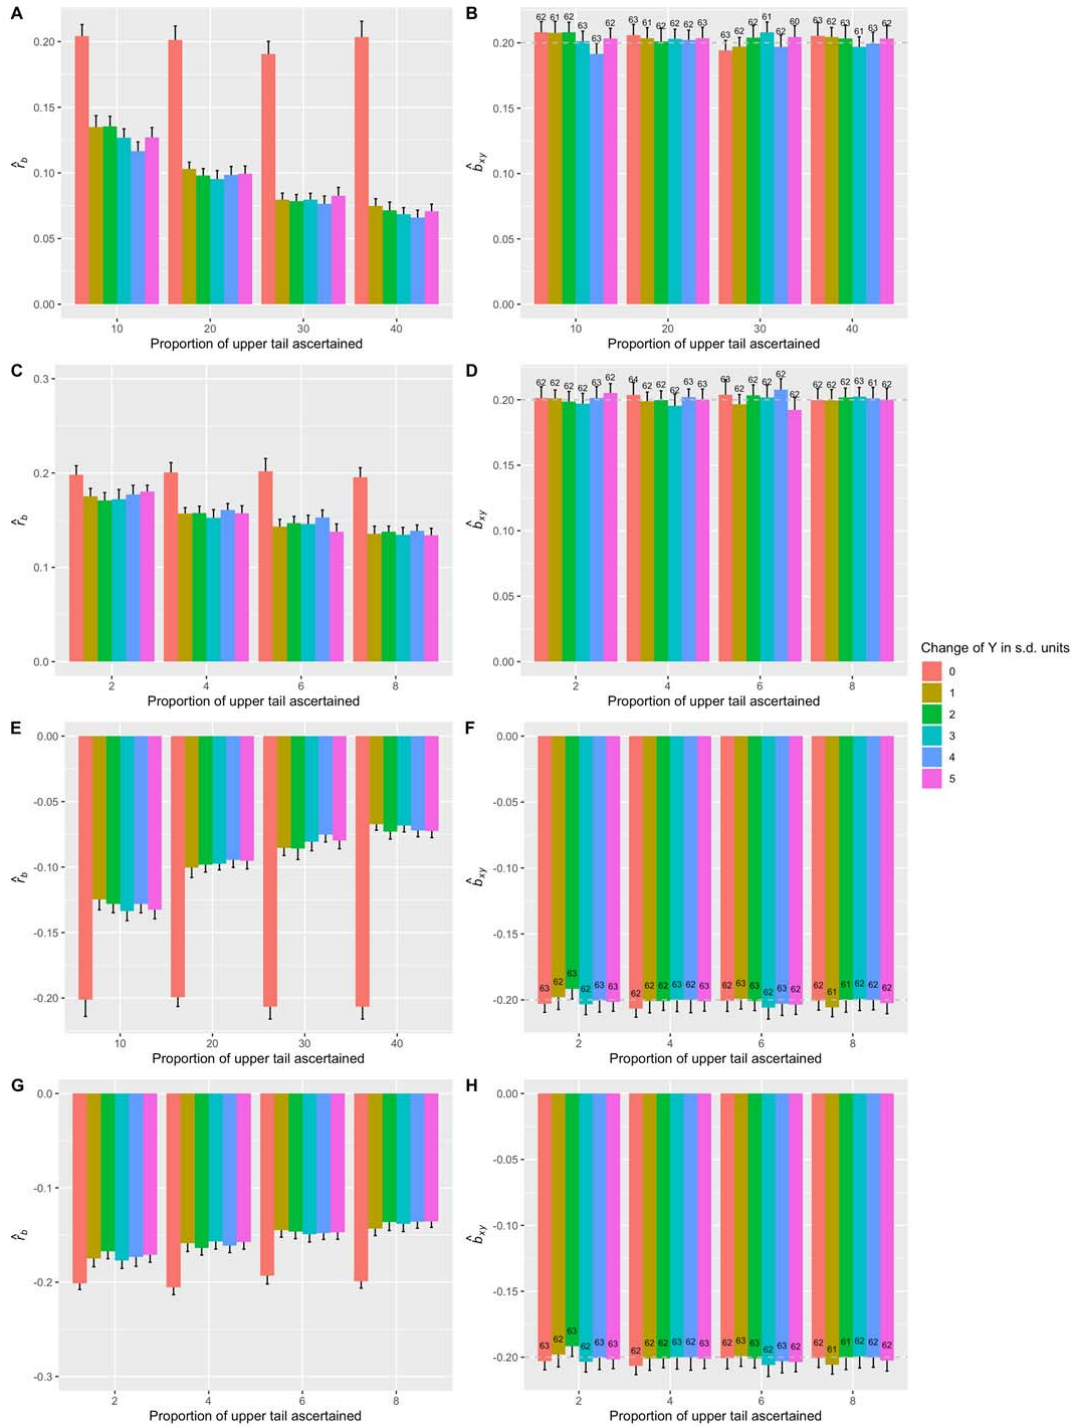

**Supplementary Figure 9. Estimates of SNP effect correlation and causal effects in simulations after the MLC corrections.** All the labels and colour code are the same as those in **Supplementary Figures 5 and 6**. Only the data simulated based on Model IV were analysed here. (A) and (B) show the  $r_b$  and  $b_{xy}$  estimates after the MLC corrections in the presence of longitudinal change, respectively. (C) and (D) show the  $r_b$  and  $b_{xy}$  estimates after the MLC corrections in the presence of underreporting, (E) and (F) show the  $r_b$  and  $b_{xy}$  estimates after the MLC corrections in the presence of longitudinal change and underreporting, respectively. (G) and (H) show the  $r_b$  and  $b_{xy}$  estimates after the MLC corrections in the presence of underreporting and longitudinal change, respectively.

182     respectively. Panels E to H are based on the same simulation setting as those for panels A to D except  
183     for that  $\hat{b}_{xy}$  is set to -0.2.

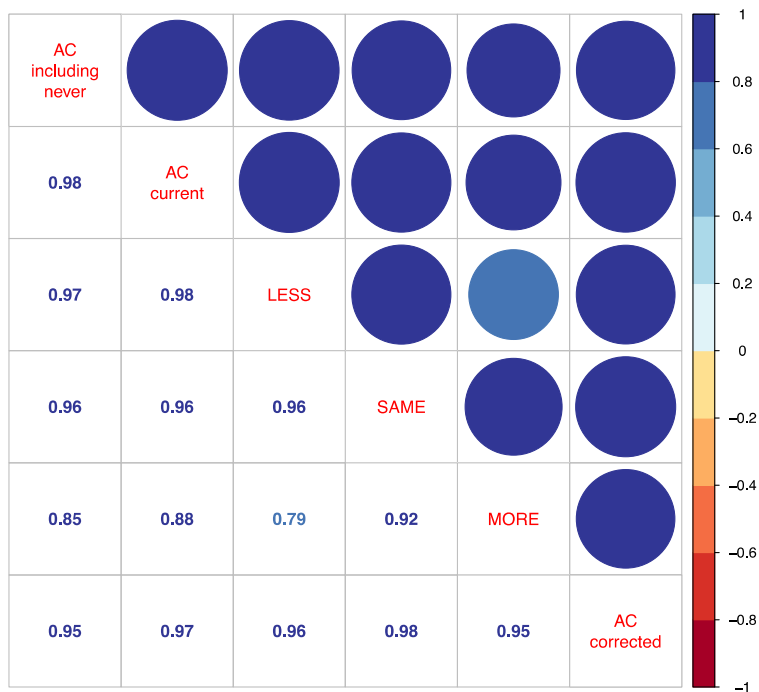

18

18

18

187

188

189

190

191

192

ent AC groups. The

.DSC analysis. The

circle in each cell above the diagonal shows the  $r_g$  estimate visually: larger circle size and darker color indicate higher  $r_g$  estimate. “AC including never” represents alcohol consumption in current and never drinkers. “AC current” represents alcohol consumption in current drinkers. LESS, SAME, and MORE represent current drinkers whose AC levels were reduced, maintained the same, and increased, respectively, compared to 10 years ago. “AC corrected” represents alcohol consumption in current drinkers after the MLC corrections.

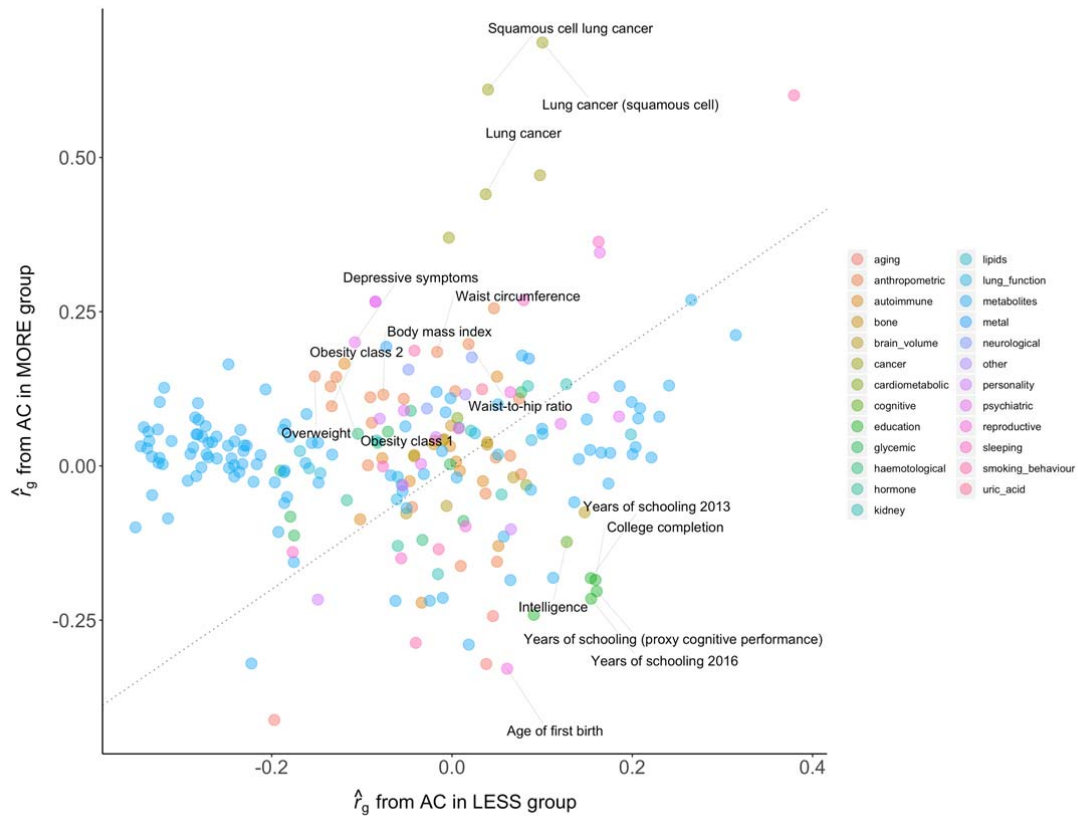

**Supplementary Figure 11. Estimates of genetic correlation between AC and 234 traits in LD**

**Hub.** The x-axis indicates the  $r_g$  estimates using AC from the LESS group, and the y-axis indicates the  $r_g$  estimates using AC from the MORE group. The traits with large differences in  $r_g$  estimate between the LESS and MORE groups are annotated. The colours of the dots indicate the trait categories defined as defined in LD Hub.



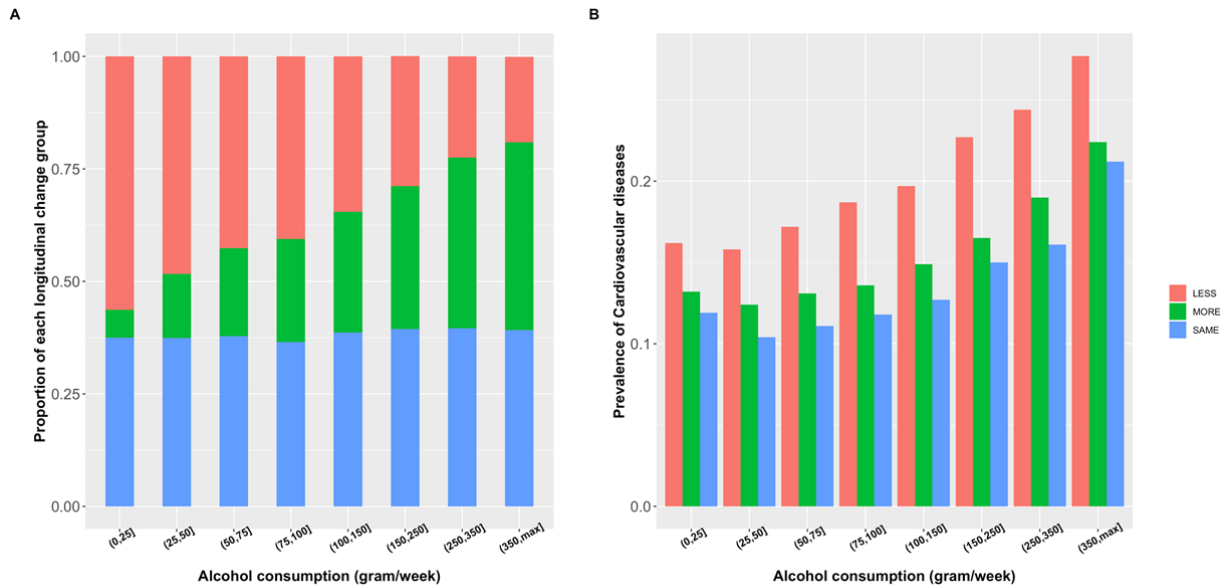

**Supplementary Figure 12. Proportion of longitudinal change patterns and CVD prevalence in different AC level groups.** (A) The x-axis shows eight AC level groups (measured by grams/week) as defined by the criteria in Wood et al.<sup>2</sup>. The y-axis shows the proportion of each longitudinal change group. (B) The y-axis denotes the prevalence of cardiovascular diseases. This x-axis is the same as in panel (A).

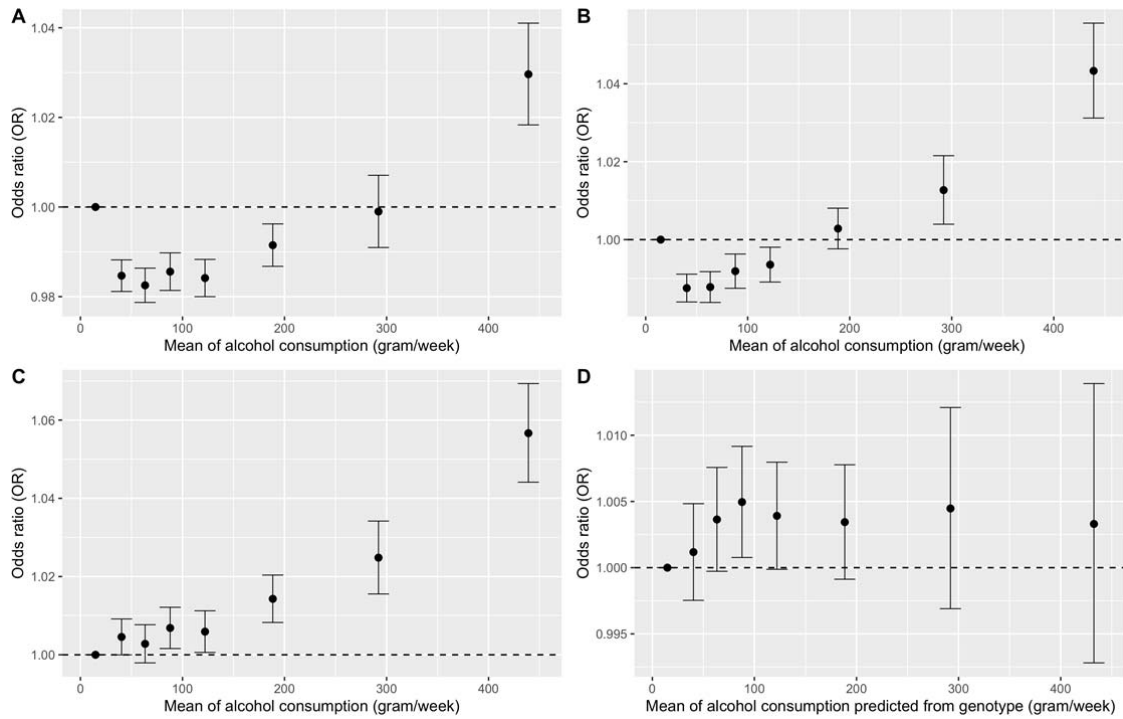

**Supplementary Figure 13. The relationship between alcohol consumption and cardiovascular disease risk.** The x-axes in panels A-C denote the mean alcohol consumption (gram/week) in each intake level group. The y-axes in all the panels denote the cardiovascular disease risk, measured by odds ratio (OR), against the reference group (intake level  $\leq 25$  grams/week). (A) The regression was performed in all current drinkers. (B) The individuals suspected to underreport AC or reduced intake due to illness/doctor's advice were removed, and the logistic regression was adjusted for the longitudinal changes. (C) Individuals from the LESS group were removed from the reference group. (D) The x-axis denotes the genetically predicted alcohol consumption. The error bars indicate the 95% confidence intervals.

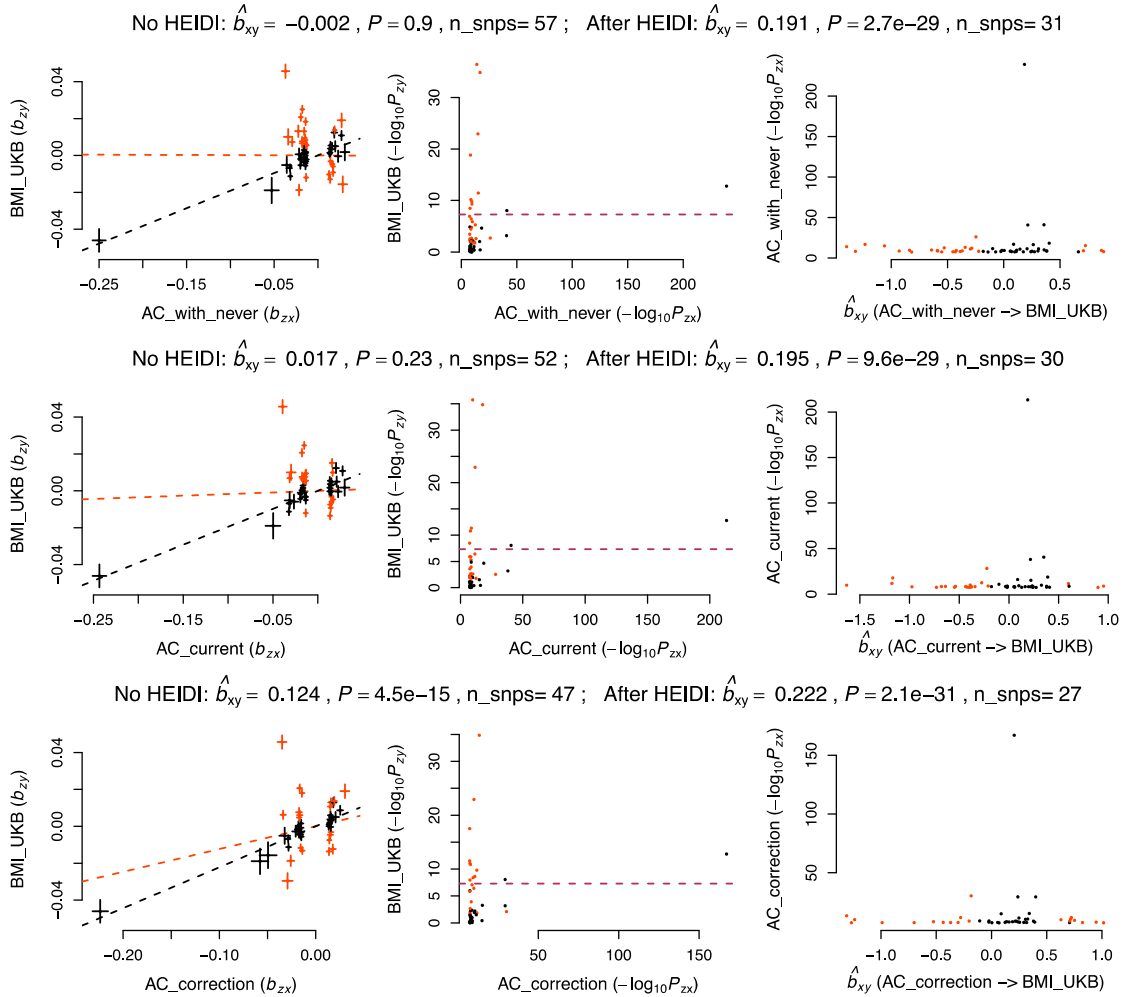

**Supplementary Figure 14. GSMR diagnostic analysis of the causal association between AC and BMI in UKB.** The genetic instruments, which were detected by the HEIDI-outlier test as pleiotropic outliers, are highlighted in red. The three panels on the left show the estimated effects of the genetic instruments (index SNPs) of AC (x-axis) against those for BMI (y-axis). The error bars indicate the standard errors of the SNP effect estimates. The slope of the red and black dashed line indicates  $\hat{b}_{xy}$  (GSMR estimate of the causal effect of AC on BMI) before and after the HEIDI-outlier filtering, respectively. The panels in the middle shows a plot of  $-\log_{10}(P)$  for the effect of an index SNPs on the exposure (x-axis) against that for the outcome (y-axis). The panels on the right show the  $\hat{b}_{xy}$  estimated using each index SNP (x-axis) against  $-\log_{10}(P)$  for the SNP effect on the exposure (y-axis). “AC\_with\_never”: AC of current and never drinkers; “AC\_current”: AC of current drinkers; “AC\_correction”: AC after the MLC corrections.

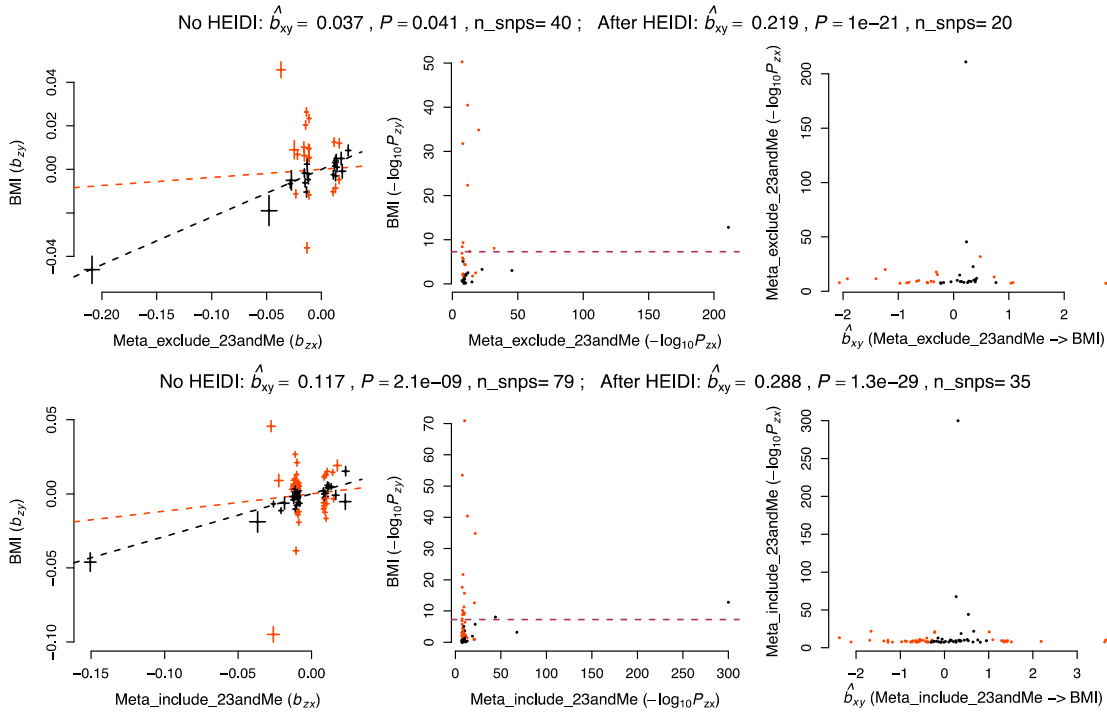

**Supplementary Figure 15. GSNR diagnostic analysis of the causal association between AC and BMI using the UKB and GSCAN data.** The genetic instruments, which were detected by the HEIDI-outlier test as pleiotropic outliers, are highlighted in red. The two panels on the left show the estimated effects of the genetic instruments (index SNPs) of AC (x-axis) against those for BMI (y-axis). The error bars indicate the standard errors of the SNP effect estimates. The slope of the red and black dashed line indicates  $\hat{b}_{xy}$  (GSNR estimate of the causal effect of AC on BMI) before and after the HEIDI-outlier filtering, respectively. The panels in the middle shows a plot of  $-\log_{10}(P)$  for the effect of an index SNPs on the exposure (x-axis) against that for the outcome (y-axis). The panels on the right show the  $\hat{b}_{xy}$  estimated using each index SNP (x-axis) against  $-\log_{10}(P)$  for the SNP effect on the exposure (y-axis). “Meta\_exclude\_23andMe” and “Meta\_include\_23andMe” represent the GSCAN data of AC excluding and including 23andMe cohort, respectively.

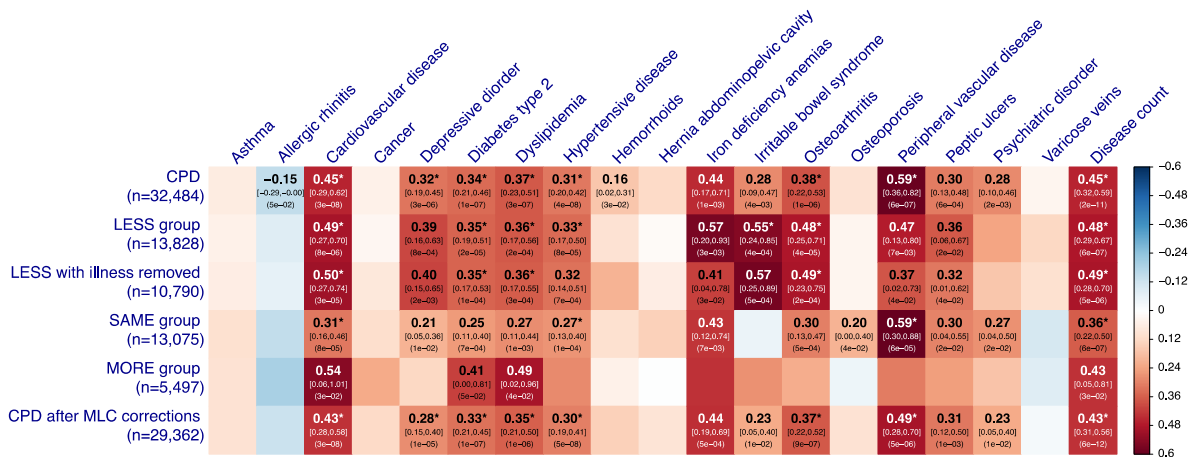

245 **Supplementary Figure 16. Estimates of genetic correlation between cigarettes per day and**  
 246 **common diseases in the UKB.** The rows denote 6 GWAS summary data sets for cigarettes per day  
 247 (CPD). The columns are 18 common diseases as well as disease count. The nominally significant  
 248 estimates ( $P$ -value  $< 0.05$ ) are labelled with the  $\hat{r}_g$  [95% confidence interval] ( $P$ -value), and the  
 249 significant estimates after multiple corrections ( $P$ -value  $< 0.05/114$ ) are labelled with an additional  
 250 asterisk. CPD represents the CPD in all current smokers; LESS, SAME, and MORE groups represent  
 251 the CPD within the group who reduced, maintained the same, or increased the amount of smoking,  
 252 respectively, compared to 10 years ago. “LESS with illness removed” represents the CPD in the LESS  
 253 group excluding individuals who reduced smoking due to illness or doctor’s advice. “CPD after MLC  
 254 corrections” represents the CPD after the MLC corrections.  
 255

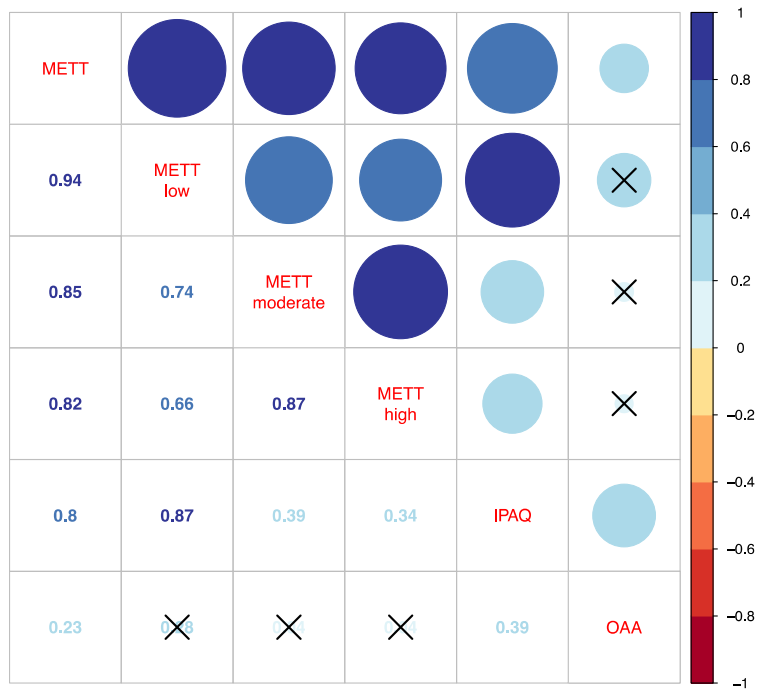

physical activity traits. The  
LDSC analysis. The

circle in each cell above the diagonal shows the  $r_g$  estimate visually: larger circle size and darker color indicate higher  $r_g$  estimate. METT: Metabolic Equivalent Task in Total. IPAQ: International Physical Activity Questionnaire. METT\_low/moderate/high: METT in each of the three IPAQ categories. OAA: overall acceleration average measured by wrist-worn accelerometers. The estimates with  $P$ -value  $> 0.05$  are annotated with a cross.

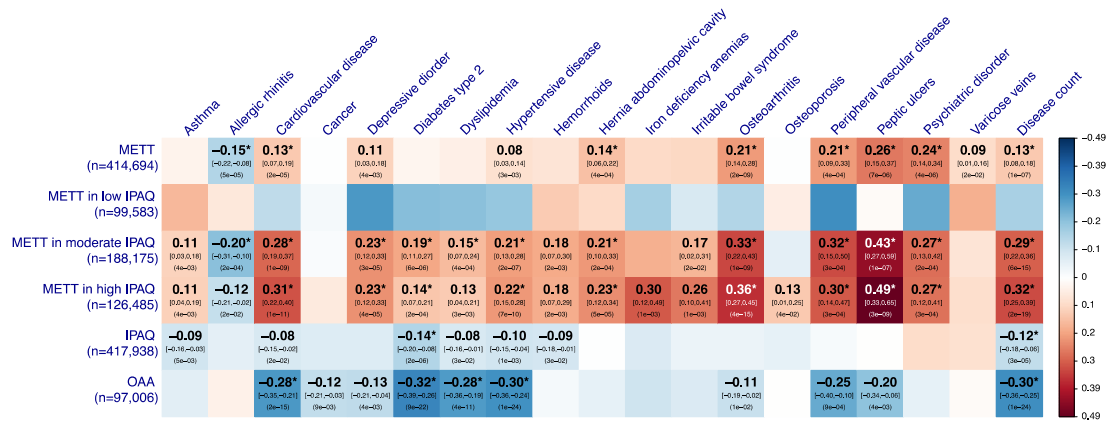

Figure 1: Heatmap showing the association between METT levels (low, moderate, high) and 18 common diseases along with disease count. The columns are 18 common diseases along with disease count. The nominally significant estimates ( $P$ -value  $< 0.05$ ) are labelled with the  $\hat{f}_g$  [95% confidence interval] ( $P$ -value), and the significant estimates after multiple corrections ( $P$ -value  $< 0.05/114$ ) are labelled with an additional asterisk.

274

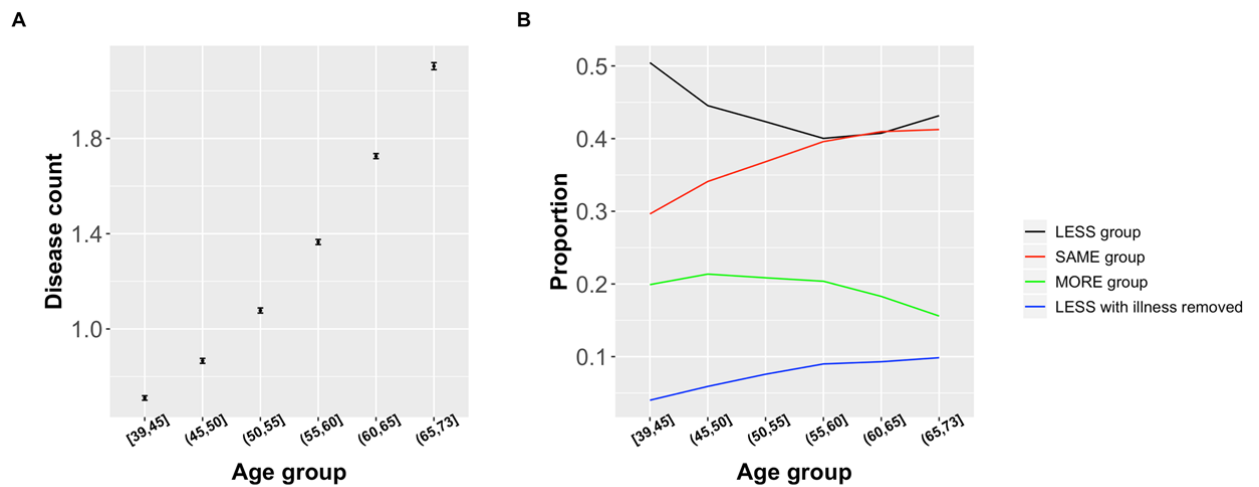

275

276

**Supplementary Figure 19. Disease count and ascertainment are age dependent.** The x-axis

277

indicates 6 different age groups. (A) The y-axis indicates the average disease count in each age group.

278

The error bars indicate 95% confidence intervals. (B) The y-axis indicates the proportion of each

279

longitudinal change group. The four groups are annotated by different colours. “LESS with illness

280

removed” represents individuals who reduced drinking because of illness or doctor’s advice,

281

compared to 10 years ago.



282     **References**

- 283     1.     Klatsky, A.L., Gunderson, E.P., Kipp, H., Udaltsova, N. & Friedman, G.D. Higher prevalence  
284           of systemic hypertension among moderate alcohol drinkers: an exploration of the role of  
285           underreporting. *Journal of Studies on Alcohol* **67**, 421-8 (2006).  
286     2.     Wood, A.M. *et al.* Risk thresholds for alcohol consumption: combined analysis of individual-  
287           participant data for 599 912 current drinkers in 83 prospective studies. *Lancet* **391**, 1513-1523  
288           (2018).  
289
